# Supplementary material for: Plant Community Composition and Structural Pattern Dynamics in Robe-Raya Natural Forest, Southeast Ethiopia
Source: Hindawi journal article supplement (doi:10.1155/2024/3155512), 2024-04-13
Supplement: f1 [file 3155512.f1.docx]

Appendix 1: Seedlings, Saplings, Density (D), Frequency (F), Relative Frequency (RF), Relative Density (RD), Relative Dominance (RDo= Relative Basal Area) and Impertinence Value Index (IVI)

| **Species** | **Seedlings** | **Saplings** | **D** | **F** | **RF** | **RD** | **RDo** | **IVI** | **Priority rank** |
| --- | --- | --- | --- | --- | --- | --- | --- | --- | --- |
| *Juniperus procera* | 33.3 | 81.7 | 125. | 95 | 6.3 | 8.9 | 25.3 | 40.6 | 39 |
| *Podocarpus Falcatus* | 50 | 53.3 | 82.9 | 83.7 | 5.3 | 0.8 | 11.3 | 17.9 | 14 |
| *Hygenia abysinica* | 10.8 | 8.3 | 20.4 | 36.5 | 2.3 | 1.4 | 12.7 | 16.8 | 12 |
| *Myrsine melanophleous* | 91.3 | 54.2 | 65.4 | 61.5 | 0.4 | 7.8 | 7.3 | 15.9 | 38 |
| *Hypericum revolutum* | 40 | 24.6 | 17.1 | 35 | 2.2 | 3 | 6.4 | 11.6 | 9 |
| *Olea europea* | 17.9 | 21.3 | 20.8 | 48.3 | 3.1 | 2.2 | 4.5 | 9.8 | 37 |
| *Rubus apetalus* | 25 | 25 | 128 | 50 | 3.2 | 6.5 | 0.0 | 9.7 | 36 |
| *Mythenus arbutifolia* | 19.2 | 10.4 | 14.6 | 31.7 | 0.4 | 1.6 | 6.8 | 8.8 | 35 |
| *Osyris lanceolata* | 20.9 | 10.4 | 19.2 | 43.3 | 2.8 | 1.9 | 3.7 | 8.4 | 34 |
| *Scheffleria abyssinicus* | 20.4 | 15 | 9.2 | 30 | 1.9 | 1.6 | 3.3 | 6.8 | 33 |
| *Carrisa spinarum* | 33.3 | 49.2 | 30.9 | 41.7 | 1.9 | 3.1 | 0.0 | 6.7 | 32 |
| *Vernonia auriculifera* | 18.5 | 13.3 | 51.1 | 43.3 | 2.8 | 3.1 | 0.0 | 6.3 | 32 |
| *Erythrina abbyssinica* | 0.8 | 2.1 | 1.7 | 5 | 0.3 | 0.2 | 4.9 | 5.8 | 31 |
| *Vangueria apiculata* | 17.9 | 12.5 | 2.5 | 12 | 1.4 | 3.5 | 0.3 | 5.5 | 30 |
| *Myrsine africana* | 10.4 | 7.9 | 17.1 | 12 | 3.9 | 1.3 | 0.0 | 5.3 | 29 |
| *Pittosporum viridflorum* | 0.3 | 5 | 4.2 | 7 | 0.4 | 0.6 | 3.7 | 4.7 | 28 |
| *Rhamnus staddo* | 3.8 | 6.3 | 9.2 | 23 | 1.5 | 0.7 | 2.1 | 4.6 | 28 |
| *Galineria saxifrage* | 7.9 | 4.2 | 4.6 | 20 | 1.3 | 0.6 | 1.9 | 3.8 | 27 |
| *Toddalia asiatica* | 20 | 19.1 | 20.9 | 25 | 1.6 | 2.2 | 0.0 | 3.8 | 27 |
| *Rubus steudneri* | 25 | 27.5 | 25 | 8 | 0.5 | 2.9 | 0.0 | 3.6 | 25 |
| *Albizia schimperana* | 4.9 | 8 | 16.7 | 32 | 2.1 | 1.1 | 0.0 | 3.4 | 24 |
| *Calpurnia aurea* | 17.9 | 18.3 | 14.6 | 17 | 1.1 | 1.9 | 0.0 | 3.2 | 24 |
| *Combretum molle* | 20 | 17.9 | 2.5 | 10 | 0.6 | 1.5 | 0.9 | 3.2 | 24 |
| *Nuxia congesta* | 6.3 | 3.3 | 9.2 | 20 | 1.3 | 0.7 | 1.0 | 3.2 | 24 |
| *Buddleja polystachya* | 4.2 | 9.6 | 7.9 | 30 | 1.9 | 0.7 | 0.3 | 2.9 | 23 |
| *Maythenus gracilipes* | 6.3 | 7.5 | 5.4 | 15 | 2.0 | 0.7 | 0.0 | 2.7 | 22 |
| *Spiniluma oxyacantha* | 3.8 | 3.3 | 5 | 17 | 1.1 | 0.4 | 1.0 | 2.5 | 21 |
| *Gymnosporia addat* | 0.4 | 0.4 | 0.8 | 7 | 1.0 | 1.3 | 0.1 | 2.4 | 20 |
| *Premna schimperi* | 12.9 | 12.1 | 9.2 | 17 | 1.1 | 1.3 | 0.0 | 2.4 | 20 |
| *Coffee Arabica* | 12.1 | 5.8 | 3.3 | 23 | 1.5 | 0.8 | 0.0 | 2.3 | 19 |
| *Ekebergia capensis* | 4.8 | 3.3 | 4.6 | 22 | 1.9 | 0.4 | 0.0 | 2.3 | 19 |
| *Vernonia amygdelina* | 35.4 | 24.7 | 33.7 | 22 | 0.8 | 1.2 | 0.3 | 2.3 | 19 |
| *Draceana afromontana* | 4.6 | 3.3 | 15 | 20 | 1.3 | 0.9 | 0.0 | 2.2 | 17 |
| *Schefflera volkensi* | 4.1 | 2.1 | 3.8 | 17 | 1.1 | 0.4 | 0.7 | 2.2 | 18 |
| *Asparagus setaceus* | 0.8 | 4.2 | 14.2 | 23 | 1.4 | 0.7 | 0.0 | 2.1 | 17 |
| *Discopodium eremanthum* | 1.7 | 12.1 | 9.6 | 18.3 | 1.2 | 0.9 | 0.0 | 2.1 | 17 |
| *Lippia abyssinica* | 10.4 | 29 | 20 | 12 | 0.8 | 1.2 | 0.0 | 2.0 | 16 |
| *Rhamnus prinoides* | 12.5 | 5 | 6,3 | 17 | 1.1 | 0.9 | 0.0 | 2.0 | 16 |
| *Prunus africana* | 7.9 | 6.3 | 3.8 | 12 | 0.8 | 0.7 | 0.3 | 1.8 | 15 |
| *Discopodium penninervium* | 5 | 5.8 | 9.2 | 15 | 1.0 | 0.7 | 0.0 | 1.7 | 13 |
| *Dombia torrida* | 1.3 | 4.2 | 15 | 12 | 0.8 | 0.9 | 0.0 | 1.7 | 13 |
| *Ehretia cymosa* | 0.8 | 1.7 | 2.9 | 7 | 1.4 | 0.2 | 0.0 | 1.6 | 13 |
| *Acokanthera schimperi* | 7.9 | 4.6 | 11.7 | 8 | 0.6 | 0.9 | 0.0 | 1.5 | 11 |
| *Flacourtea indica* | 3.3 | 1.3 | 2.5 | 13 | 0.9 | 0.3 | 0.3 | 1.5 | 11 |
| *Grewia ferruginea* | 3.3 | 2.1 | 2.1 | 10 | 0.7 | 0.3 | 0.5 | 1.5 | 11 |
| *Trichilia prieurana* | 8.3 | 4.6 | 9.2 | 10 | 0.7 | 0.8 | 0.0 | 1.5 | 12 |
| *Secamone cumpulata* | 10 | 6.3 | 12.1 | 5 | 0.4 | 1.1 | 0.0 | 1.5 | 11 |
| *Ziziphus abyssinica* | 5 | 4.2 | 17.3 | 6.7 | 0.5 | 1.0 | 0.0 | 1.5 | 11 |
| *Clematis hirsuta* | 0.8 | 1.3 | 3.3 | 8 | 1.1 | 0.2 | 0.0 | 1.3 | 10 |
| *Phyllanthus ovalifolius* | 2.9 | 1.3 | 10.4 | 13 | 0.8 | 0.5 | 0.0 | 1.3 | 11 |
| *Searsia pyroides* | 6.3 | 5 | 2.5 | 12 | 0.8 | 0.5 | 0.0 | 1.3 | 11 |
| *Buddleja davidii* | 1.7 | 4.1 | 8.3 | 12 | 0.7 | 0.5 | 0.0 | 1.2 | 9 |
| *Combretum adenogonium* | 1.7 | 3.3 | 2.1 | 10 | 0.6 | 0.3 | 0.3 | 1.2 | 9 |
| *Erica arborea* | 1.3 | 2.9 | 16.7 | 7 | 0.4 | 0.8 | 0.0 | 1.2 | 9 |
| *Boscia angustifolia* | 0.4 | 1.3 | 8.3 | 10 | 0.7 | 0.4 | 0.0 | 1.1 | 8 |
| *Cissampoles pareira* | 2.1 | 4.2 | 6.3 | 10 | 0.6 | 0.5 | 0.0 | 1.1 | 8 |
| *Combretum collinum* | 4.2 | 4.2 | 9.2 | 8 | 0.5 | 0.6 | 0.0 | 1.1 | 8 |
| *Echinops longisetus* | 2.1 | 3.3 | 3.8 | 12 | 0.8 | 0.3 | 0.0 | 1.1 | 8 |
| *Hippocratea africana* | 1.7 | 1.3 | 5.8 | 12 | 0.8 | 0.3 | 0.0 | 1.1 | 8 |
| *Inula confertiflora* | 1.3 | 0 | 2.9 | 8 | 0.5 | 0.6 | 0.0 | 1.1 | 8 |
| *Bersama abyssinica* | 0.8 | 1.3 | 5.8 | 10 | 0.7 | 0.3 | 0.0 | 1.0 | 7 |
| *Olea capensis* | 0 | 0 | 4.2 | 5 | 0.3 | 0.6 | 0.1 | 1.0 | 8 |
| *Vepris nobilis* | 2.1 | 0.8 | 2.1 | 12 | 0.8 | 0.2 | 0.0 | 1.0 | 8 |
| *Teclea simplicifolia* | 0.8 | 1.7 | 2.9 | 13 | 0.8 | 0.2 | 0.0 | 1.0 | 8 |
| *Vachellia abyssinica* | 4.1 | 2.1 | 2.9 | 8 | 0.5 | 0.3 | 0.1 | 0.9 | 6 |
| *Acanthus sennii* | 0.8 | 0.8 | 2.5 | 12 | 0.7 | 0.2 | 0.0 | 0.9 | 6 |
| *Asparagus africanus* | 1.3 | 1.3 | 3 | 12 | 0.7 | 0.2 | 0.0 | 0.9 | 6 |
| *Dovyalis abyssinica* | 2.1 | 3.3 | 7.1 | 7 | 0.4 | 0.5 | 0.0 | 0.9 | 6 |
| *Leonotis ocymfolia* | 0 | 1.7 | 7.1 | 10 | 0.6 | 0.3 | 0.0 | 0.9 | 6 |
| *Rosa abyssinica* | 1.7 | 2.1 | 5 | 10 | 0.6 | 0.3 | 0.0 | 0.9 | 6 |
| *Scutia myrtina* | 0 | 3.3 | 10 | 6.7 | 0.4 | 0.5 | 0.0 | 0.9 | 6 |
| *Sida schimperiana* | 10.5 | 7.5 | 3.8 | 6.7 | 0.1 | 0.8 | 0.0 | 0.9 | 6 |
| *Solanum anguivi* | 0 | 2.1 | 5.4 | 10 | 0.6 | 0.3 | 0.0 | 0.9 | 6 |
| *Carduus nyassanus* | 4.6 | 1.3 | 1.7 | 8 | 0.5 | 0.3 | 0.0 | 0.8 | 5 |
| *Allophylus abyssinicus* | 1.7 | 1.3 | 1.7 | 10 | 0.6 | 0.2 | 0.0 | 0.8 | 5 |
| *Maesa lanceolata* | 0 | 1.7 | 3.8 | 10 | 0.6 | 0.2 | 0.0 | 0.8 | 5 |
| *Solanecio gigas* | 0.8 | 1.3 | 2.9 | 10 | 0.6 | 0.2 | 0.0 | 0.8 | 5 |
| *Clutia abyssinica* | 0.8 | 2.9 | 1.3 | 7 | 0.5 | 0.2 | 0.0 | 0.7 | 4 |
| *Conyza spinosa* | 0.8 | 1.3 | 2.1 | 8 | 0.5 | 0.2 | 0.0 | 0.7 | 4 |
| *Dodonaea viscosa* subsp. *angustifolia* | 7.1 | 1.7 | 2.7 | 8 | 0.5 | 0.2 | 0.0 | 0.7 | 4 |
| *Euclea racemosa* subsp. *schimperi* (A,D.C.) Dandy | 1.7 | 2.1 | 3.8 | 7 | 0.4 | 0.3 | 0.0 | 0.7 | 4 |
| *Macaranga capensis* | 0.7 | 0.8 | 3.3 | 5 | 0.3 | 0.4 | 0.0 | 0.7 | 4 |
| *Solanum aculeatissimum* | 0.8 | 1.3 | 3.8 | 8 | 0.5 | 0.2 | 0.0 | 0.7 | 4 |
| *Solanum incanum* | 1.7 | 1.3 | 2.1 | 8 | 0.5 | 0.2 | 0.0 | 0.7 | 4 |
| *Canthium oligocarpum* | 1.3 | 0.8 | 2.1 | 7 | 0.4 | 0.2 | 0.0 | 0.6 | 3 |
| *Carduus leptacanthus* | 2.5 | 1.3 | 1.3 | 7 | 0.4 | 0.2 | 0.0 | 0.6 | 3 |
| *Diospyros abyssinica* | 1.7 | 0.8 | 1.7 | 7 | 0.4 | 0.2 | 0.0 | 0.6 | 3 |
| *Dracaena steudnerii* | 0.8 | 1.7 | 2.9 | 7 | 0.4 | 0.2 | 0.0 | 0.6 | 3 |
| *Erythrina brucei* | 2.9 | 0 | 2.5 | 30 | 0.4 | 0.2 | 0.0 | 0.6 | 3 |
| *Euphorbia schimperiana* | 5 | 0.8 | 0.8 | 7 | 0.4 | 0.2 | 0.0 | 0.6 | 3 |
| *Crotalaria agatiflora* | 0.4 | 0.8 | 2.1 | 7 | 0.4 | 0.1 | 0.0 | 0.5 | 2 |
| *Echinops ellenbeckii* | 1.7 | 0.8 | 0.8 | 7 | 0.4 | 0.1 | 0.0 | 0.5 | 2 |
| *Ehretia abyssinica* | 1.7 | 1.7 | 1.3 | 5 | 0.3 | 0.2 | 0.0 | 0.5 | 2 |
| *Vachellia tortilis* | 0 | 0 | 1.3 | 5 | 0.3 | 0.0 | 0.1 | 0.4 | 1 |
| **Total** | **772** | **748.2** | **1119** |  |  |  |  | **300** |  |
